# Supplementary material
Source: HighWire-hosted journal article supplement (https://bmjopen.bmj.com/content/14/5/e082247)
Supplement: inline-supplementary-material-3 [file inline-supplementary-material-3.pdf]

Supplemental file 3

Template for charting included articles

|                                                                                                                                              |  |
|----------------------------------------------------------------------------------------------------------------------------------------------|--|
| Reference                                                                                                                                    |  |
| Country of study                                                                                                                             |  |
| Focus of paper: Co Production in design, implementation, evaluation or overall evaluation of co-designing digital mental health intervention |  |
| Population; target issue; brief account of digital intervention; mental health promotion-primary prevention or targeted intervention         |  |
| Methodology of co-design; sample; outcomes                                                                                                   |  |
| Key Theme(s)                                                                                                                                 |  |
| Issues/ debates identified                                                                                                                   |  |

|                                                               |  |
|---------------------------------------------------------------|--|
| Limitations                                                   |  |
| Evaluation of study (key findings / overall conclusions only) |  |
| Relevance to research objective/s                             |  |
| Notes:                                                        |  |
| Reviewed by:                                                  |  |

\* This template will be further refined at the review stage and updated accordingly.
